# Supplementary material for: Charge reversible calcium phosphate lipid hybrid nanoparticle for siRNA delivery
Source: PubMed Central journal article supplement (PMC5522105; doi:10.18632/oncotarget.17484), 2017-04-27
Supplement: oncotarget-08-42772-s001.pdf [file oncotarget-08-42772-s001.pdf]

# Charge reversible calcium phosphate lipid hybrid nanoparticle for siRNA delivery

## Supplementary Materials

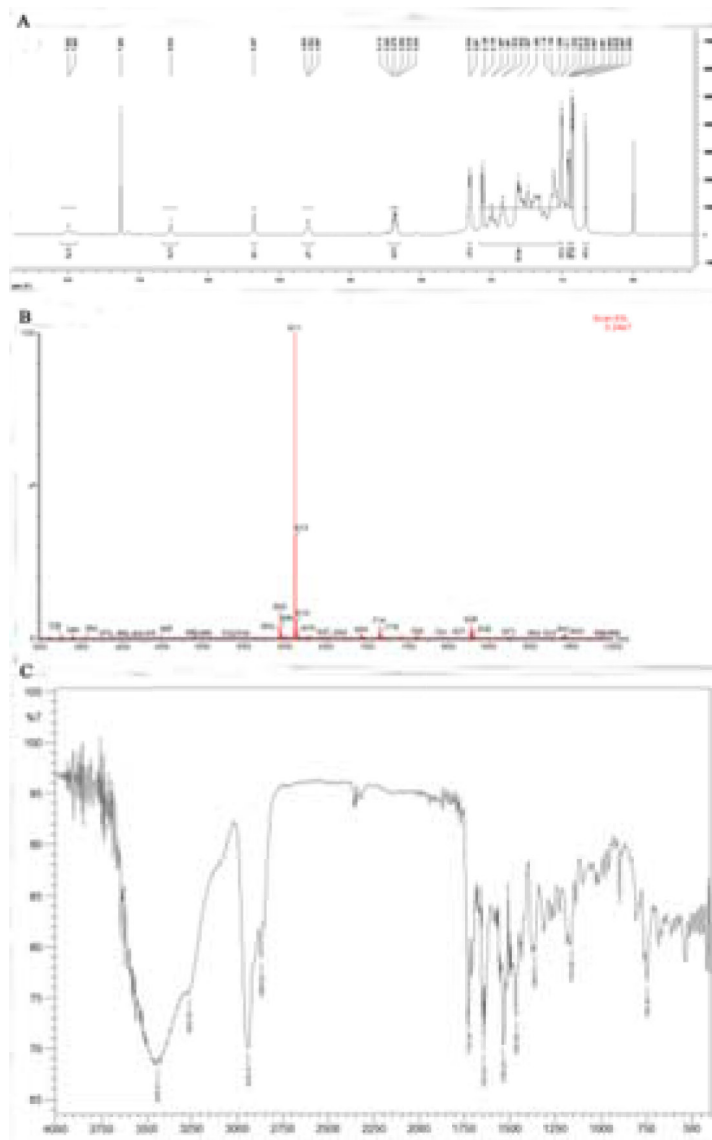

Supplementary Figure 1: The  $^1\text{H}$  NMR spectrum, mass spectrum and FTIR spectrum of CHOL-AA-Cit.

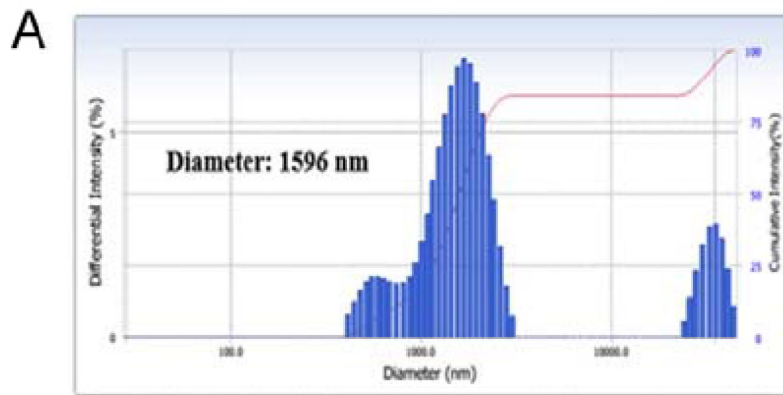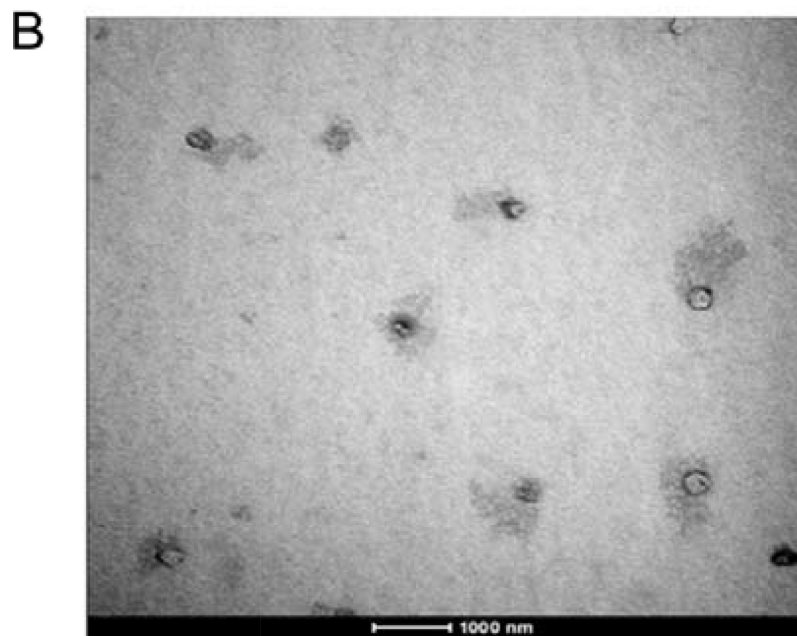

**Supplementary Figure 2:** The size of LNPS@siBcl-2 in pH5.5 medium detected by dynamic light scattering (A) and transmission electron microscopy (B).

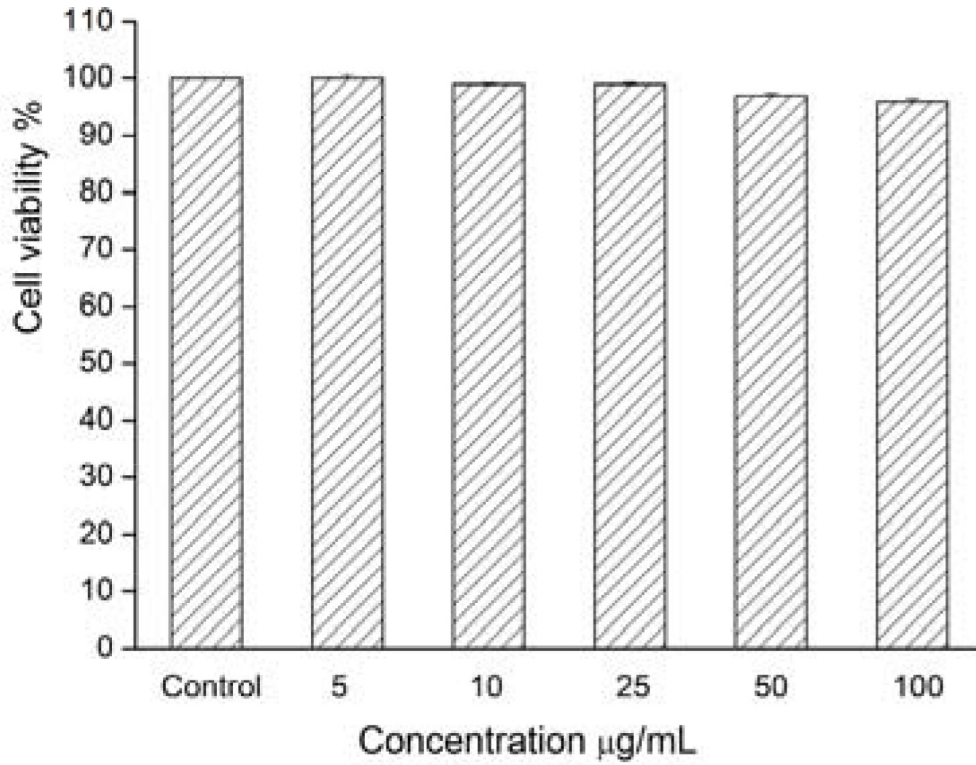

**Supplementary Figure 3: Cytotoxicity of the calcium phosphate lipid hybrid nanoparticles without loading siBcl-2 (LNPS) on A549 cells.**

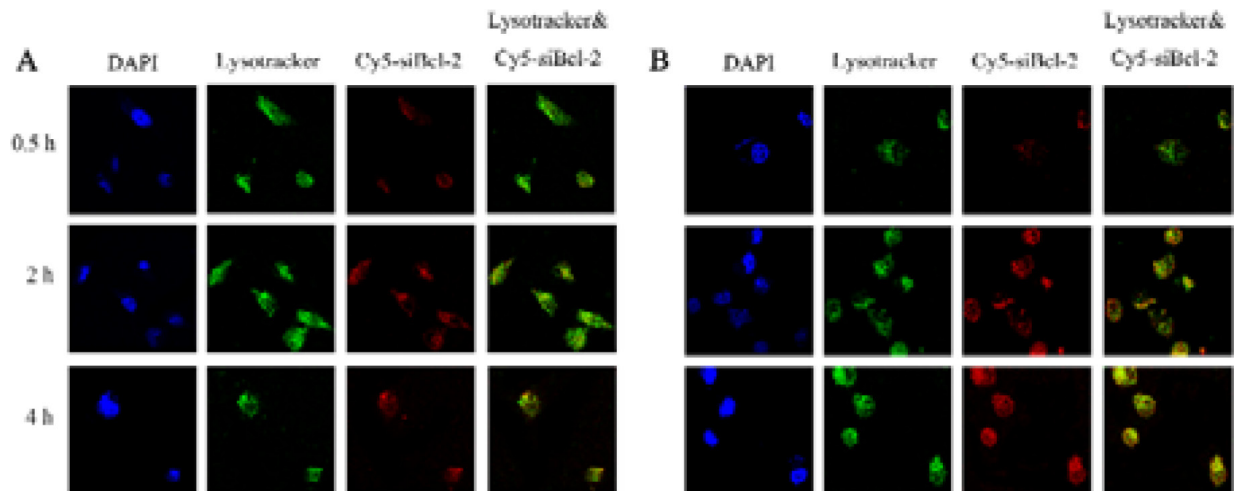

**Supplementary Figure 4: Intracellular trafficking of Cy5-siBcl-2 in A549 cells delivered by NLNPS@Cy5-siBcl-2.** (Panel A and panel B) are the subcellular distribution of Cy5-siBcl-2 delivered by NLNPS@Cy5-siBcl-2 in pH7.4 and pH 6.5 medium, respectively.  $20\times$  oil immersion objective and  $10\times$  ocular lens. Red stands for Cy5-siBcl-2, green stands for endolysosome and blue stands for nucleus. Yellow stands for Cy5-siBcl-2 in endolysosome.

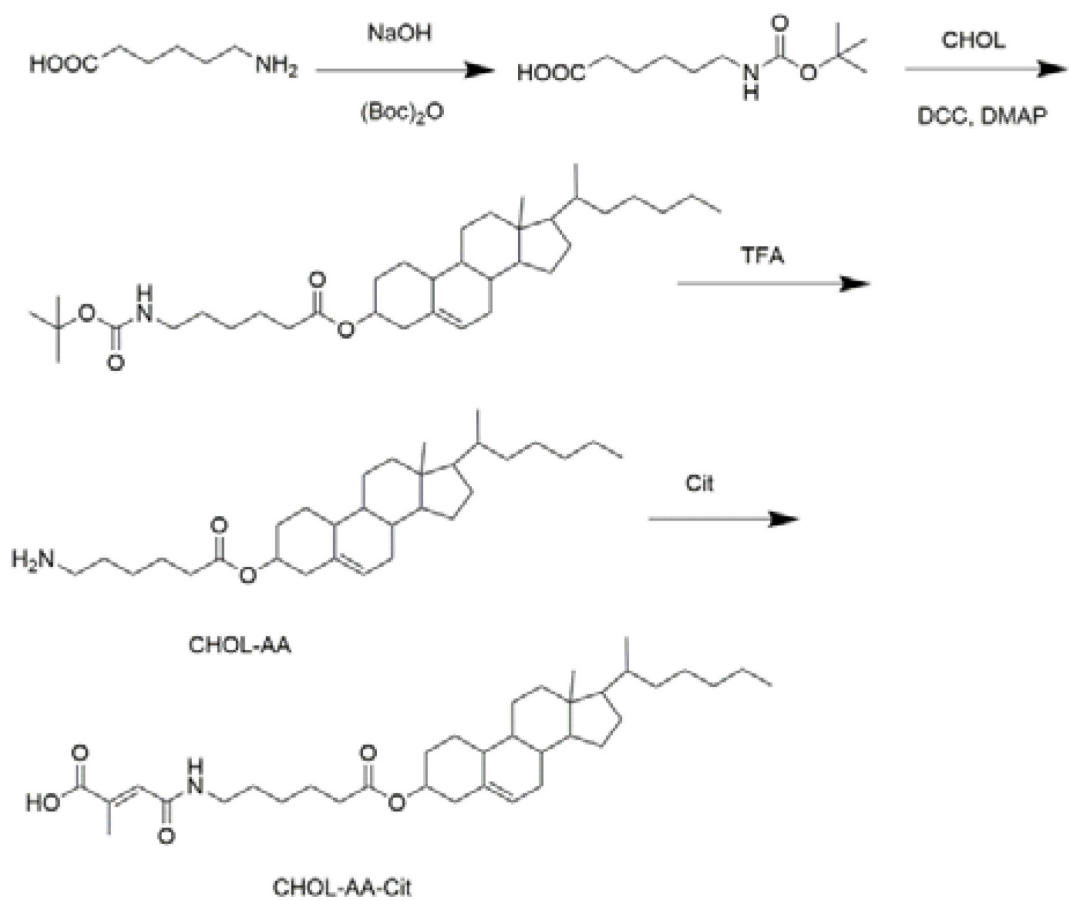

Supplementary Figure 5: Synthetic route of CHOL-AA-Cit.
